# Supplementary material for: Enhanced thermal decomposition kinetics of poly(lactic acid) sacrificial polymer catalyzed by metal oxide nanoparticles
Source: Royal Society of Chemistry journal article supplement (doi:10.1039/c5ra19303f), 2015-01-01
Supplement: c5ra19303f1.pdf [file c5ra19303f1.pdf]

Supporting information for

## **Enhanced thermal decomposition and kinetics of Poly (Lactic Acid) sacrificial polymer catalyzed by metal oxide nanoparticles**

Lu Liu<sup>a</sup>, Michael R. Zachariah<sup>\*ab</sup>, Stanislav I. Stoliarov<sup>c</sup>, Jing Li<sup>\*d</sup>

- a. Department of Chemistry and Biochemistry, University of Maryland, College Park, MD 20742, USA
- b. Department of Chemical and Biomolecule Engineering, University of Maryland, College Park, MD 20742, USA
- c. Department of Fire Protection Engineering, University of Maryland, College Park, MD 20742, USA
- d. Department of Fire Science & Professional Studies, University of New Haven, West Haven, CT, 06516, USA

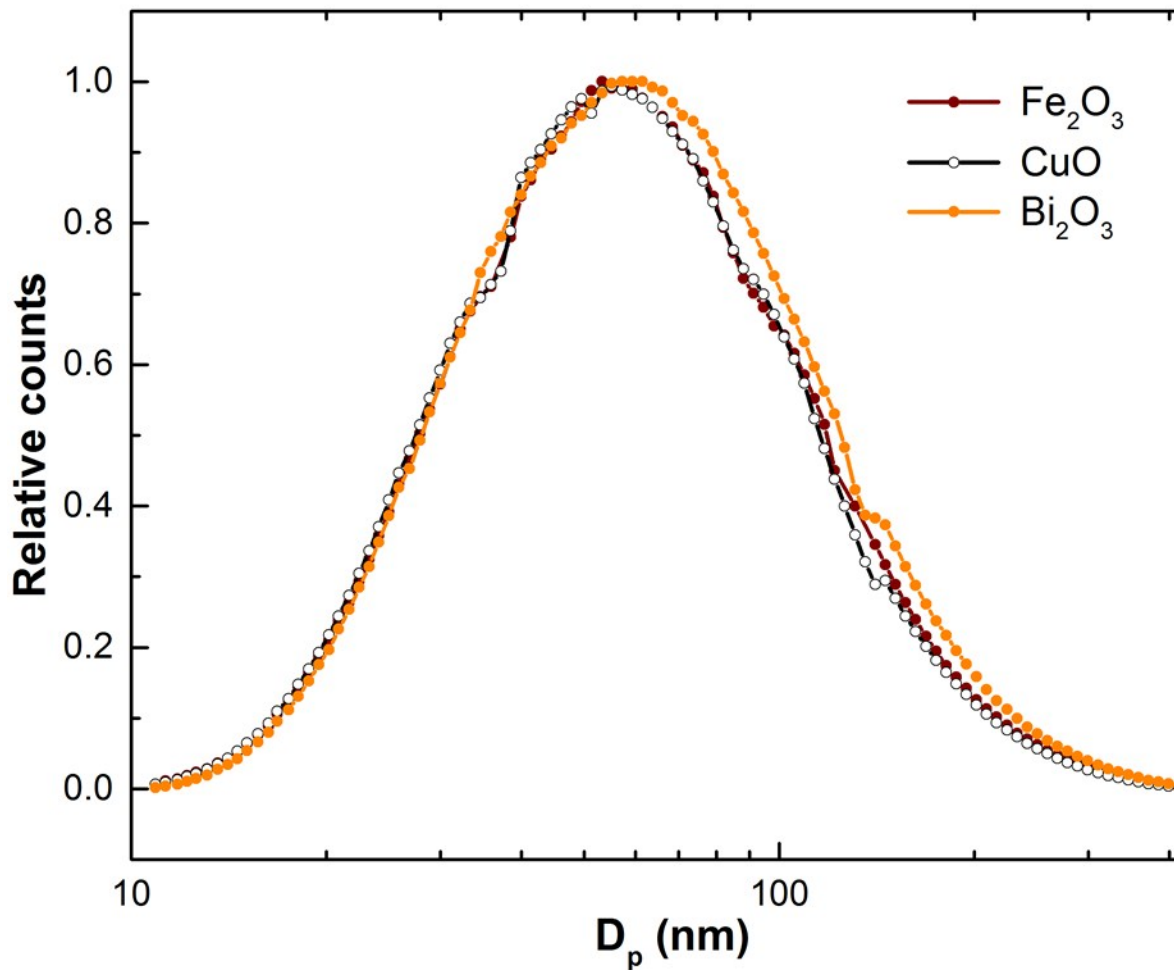

**Figure S1.** Particle-size distributions of  $Fe_2O_3$ , CuO,  $Bi_2O_3$  as-synthesized by spray pyrolysis measured using a differential mobility analyzer (DMA) coupled with a condensation particle counter (CPC).

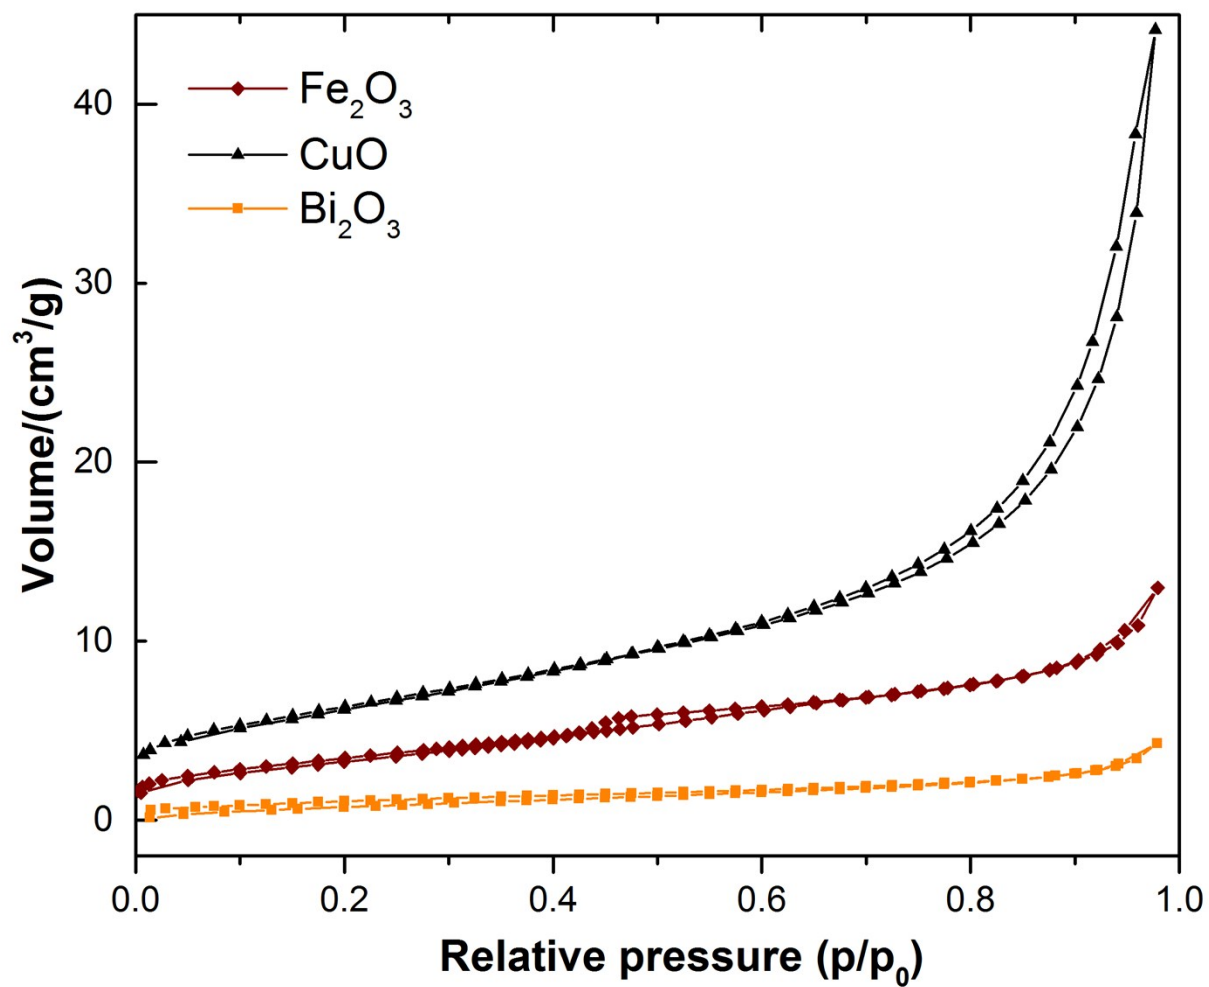

**Figure S2.** N<sub>2</sub> adsorption/desorption isotherms of Fe<sub>2</sub>O<sub>3</sub>, CuO, Bi<sub>2</sub>O<sub>3</sub>.

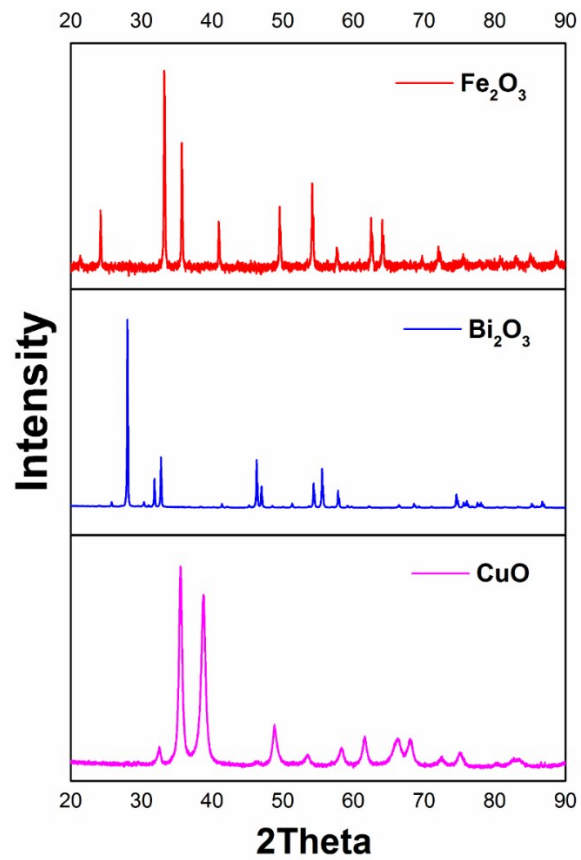

**Figure S3.** XRD of nanoparticles- $\text{Bi}_2\text{O}_3$ ,  $\text{Fe}_2\text{O}_3$ ,  $\text{CuO}$  from spray pyrolysis.
